# Supplementary material for: Precision Aquaculture Drone Mapping of the Spatial Distribution of Kappaphycus alvarezii Biomass and Carrageenan
Source: MDPI journal article supplement (doi:10.3390/rs15143674), 2023-07-23
Supplement: s1 [file s1]

Archive with 1 entries (1 files):
- remotesensing-2472252-SI.pdf
