# Supplementary material for: Precision Aquaculture Drone Mapping of the Spatial Distribution of Kappaphycus alvarezii Biomass and Carrageenan
Source: MDPI journal article supplement (doi:10.3390/rs15143674), 2023-07-23
Supplement: s1 [file s1 › remotesensing-2472252-SI.pdf]

## Supplementary Material

**Table S1.** Dates of the three cultivation cycles of *Kappaphycus* monitored in 2022 in Punaga (South Sulawesi) and corresponding water quality variables. Temp = Temperature, Sal = Salinity, NTU = Nephelometric Turbidity Unit, NO<sub>3</sub><sup>-</sup> = Nitrates, PO<sub>4</sub><sup>3-</sup> = Phosphates. Standard deviation in brackets. For carrageenan content, n = 5. NA = not available. Seawater variables were obtained for each cycle and sampling date. Water temperature was measured in situ using a digital thermometer, along with salinity measurements carried out using a digital refractometer. Water samples were stored in 1 L bottles and kept in a cool box during transportation from the field to the laboratory for pH, turbidity, nitrate (NO<sub>3</sub><sup>-</sup>) and phosphate (PO<sub>4</sub><sup>3-</sup>) analysis. Turbidity was measured with a turbidimeter and expressed in Nephelometric Turbidity Units (NTU). Nutrient concentrations (mg.L<sup>-1</sup>) were measured using a DREL 2800 spectrophotometer and processed with the methods described by [61].

| Cycle | Date  | Temp<br>(°C) | Sal  | NTU  | PH   | NO <sub>3</sub> <sup>-</sup><br>(mg L <sup>-1</sup> ) | PO <sub>4</sub> <sup>3-</sup><br>(mg L <sup>-1</sup> ) |
|-------|-------|--------------|------|------|------|-------------------------------------------------------|--------------------------------------------------------|
| 1     | 10/03 | 26.8         | 33.0 | 8.6  | 7.78 | 0.14                                                  | 0.01                                                   |
| 1     | 29/03 | 26.9         | 34.7 | 10.4 | 7.87 | 0.24                                                  | 0.02                                                   |
| 1     | 10/04 | 28.0         | 34.0 | 12.6 | 7.73 | 0.26                                                  | 0.01                                                   |
| 1     | 16/04 | 28.7         | 35.1 | 15.4 | 7.68 | 0.18                                                  | 0.01                                                   |
| 2     | 19/04 | 27.6         | 33.4 | 6.8  | 7.83 | 0.14                                                  | 0.02                                                   |
| 2     | 28/04 | 28.3         | 34.8 | 9.6  | 7.94 | 0.17                                                  | 0.02                                                   |
| 2     | 10/05 | 27.2         | 34.9 | 14.8 | 7.97 | 0.19                                                  | 0.02                                                   |
| 2     | 20/05 | 27.9         | 34.0 | 16.8 | 7.92 | 0.14                                                  | 0.02                                                   |
| 2     | 30/05 | 28.6         | 34.7 | 10.6 | 7.74 | 0.26                                                  | 0.02                                                   |
| 3     | 08/06 | 27.4         | 33.6 | 15.8 | 7.78 | 0.10                                                  | 0.01                                                   |
| 3     | 17/06 | 27.7         | 34.0 | 16.4 | 7.86 | 0.16                                                  | 0.01                                                   |
| 3     | 27/06 | 27.8         | 34.5 | 25.8 | 7.92 | 0.10                                                  | 0.01                                                   |
| 3     | 08/07 | 28.8         | 34.6 | 40.4 | 7.97 | 0.03                                                  | 0.01                                                   |
| 3     | 19/07 | 28.8         | 34.0 | 37.5 | 7.93 | 0.34                                                  | 0.01                                                   |
